# Supplementary material
Source: Copernicus journal article supplement (doi:10.5194/amt-19-2379-2026)
Supplement: Supplementary file 1 [file amt-19-2379-2026-supplement.pdf]

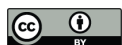

*Supplement of*

## **Modification and validation of a commercial dynamic chamber for reactive nitrogen and greenhouse gas flux measurements**

**Moxy Shah et al.**

*Correspondence to:* Trevor C. VandenBoer (tvandenb@yorku.ca)

The copyright of individual parts of the supplement might differ from the article licence.

1 **S1. Chamber customized components and LabVIEW software**

2 To meet the performance requirements for measuring  $N_r$  gases, chamber modifications were  
3 implemented to create inert surfaces that transmit them effectively to downstream gas analyzers.  
4 In addition, a reference chamber with an inert surface at the bottom (Figure S1) was required to  
5 benchmark the performance of a modified chamber (Figure S2) where fittings and surfaces  
6 identified to be reactive or to facilitate stronger surface interactions were replaced with more inert  
7 components.

8

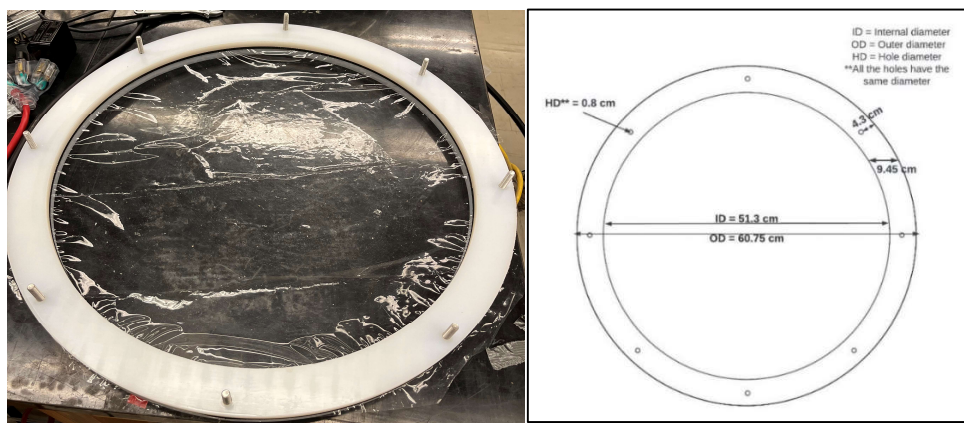

10 **Figure S1.** (left) Image of the custom-made base rings made from 1.2 cm thick PTFE with a PFA  
11 film pinned between them; all the holes have identical diameters, are located equidistant from the  
12 edges of the plate and can fit M8 bolts secured with corresponding nuts (McMasterr-Carr®, PN:  
13 90591A161 and 91263A918). (right) Technical scale drawing of a custom-made ring for the  
14 chambers with the inner diameter, outer diameter, ring width, and diameter of holes and their  
15 distance from the outer edges denoted.

16

17 A custom LabVIEW program was created to automate control of the solenoid valves and mass  
18 flow controller in the measurement set up using the microcontroller. The front panel of the  
19 LabVIEW program (Figure S3a) allows for the timings of the solenoid valve changes to be  
20 manually set, along with the log intervals. The VI controls valve states (i.e., for V1, V2, and V3)  
21 and synchronization of the valve switching with respect to each chamber opening and closing cycle  
22 as described in the previous section. The VI also generates its own text file containing valve  
23 open/close state and a timestamp to be used for data processing. A custom R script (R Studio  
24 v3.0.1) was developed to process the data file generated by eoslink-AC, data from all reactive gas  
25 analyzers, and the VI. A graphical representation of the valve states in real time is included on the  
26 front window to allow for the user to assess the measurement state. In the back window (Figure

27 S3b), the valve timings are controlled within a state machine to allow for continuous valve  
28 switching at the time interval selected on the front window. The MFC flow rate is controlled by  
29 sending the required voltage to the MFC. The data logging of the valve switching timings and  
30 MFC flowrates are handled as well within a state machine to ensure continuous logging to a csv  
31 file. The LabVIEW VI is available on the GitHub repository ([https://github.com/fjs-  
32 vdbl/fluxchamber.git](https://github.com/fjs-vdbleab/fluxchamber.git)).

33

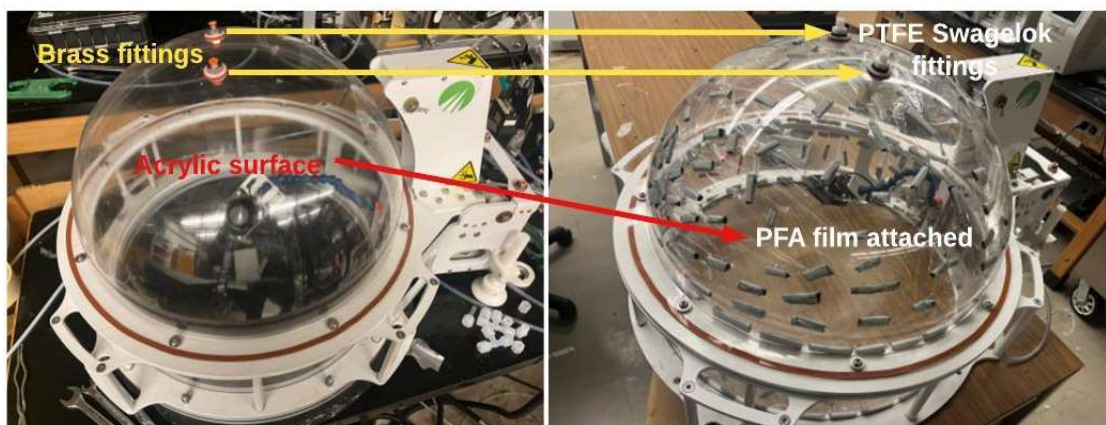

34  
35 **Figure S2.** (left) The chamber is in its original configuration from the manufacturer with brass  
36 push-connect inlet and outlet fittings and an acrylic dome. (right) The modified chamber with 1/4”  
37 PTFE Swagelok bulkhead fittings and an attached film of PFA on the interior of the acrylic dome  
38 and all chamber sidewalls using adhesive tape.

39

40

41

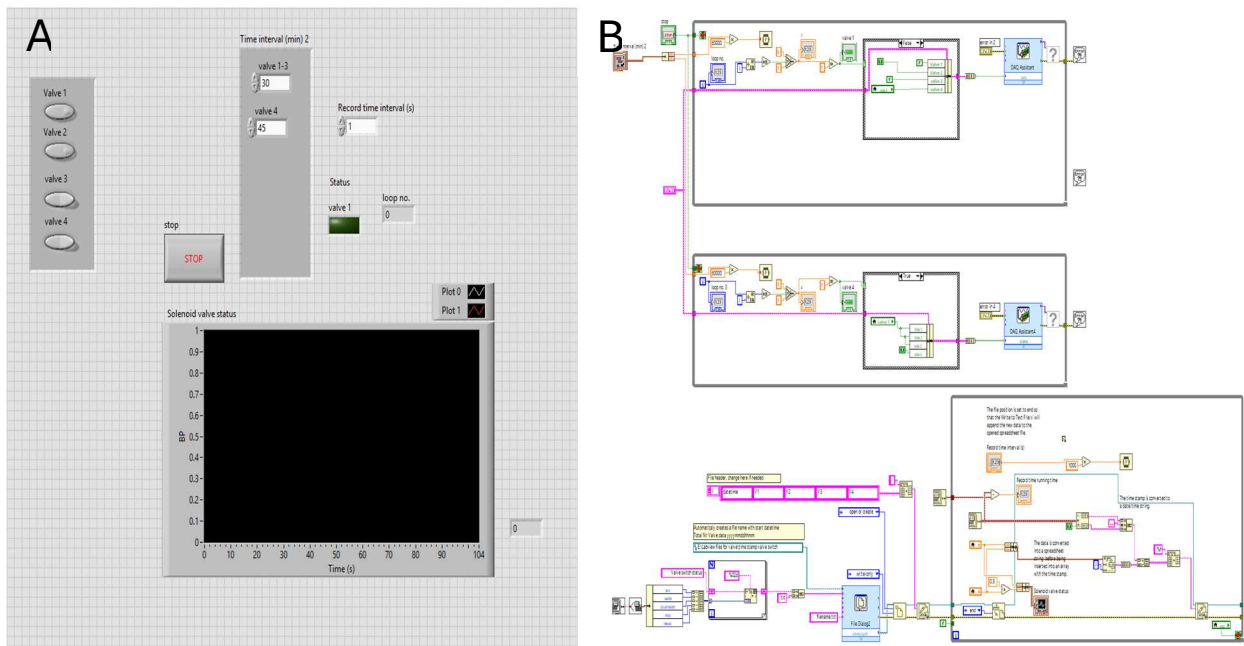

42  
 43 **Figure S3.** Screenshot of our custom LabVIEW VI for controlling the reference and measurement  
 44 chambers (A) flows, valve states, timing for lid closures, and rate of datalogging through a  
 45 graphical user interface front window, and (B) the back window virtual machines controlling the  
 46 objects, voltages, and data flows.

47  
 48 **S2. Gas analyzer quality control procedures**

49 The NO<sub>x</sub> analyzer is calibrated with multipoint NO and NO<sub>2</sub> mixing ratios to generate calibration  
 50 curves on at least an annual basis, with span checks and blanks performed regularly prior to the  
 51 collection of experimental data. For field use, a full calibration is performed prior to relocation of  
 52 the system to the deployment site, a span check on site, and again at the end of the deployment  
 53 period to account for any instrumental drift. Zero air from a gas-calibration instrument (Gascal  
 54 1100TS, American Ecotech, Warren, RI) is introduced to the analyzer through the sampling inlet  
 55 to set the zero point. If the NO, NO<sub>2</sub> and NO<sub>x</sub> readings are within  $\pm 0.5$  ppbv of one another, the  
 56 zero offset is calculated and applied. Then, an NO span check is performed using a known mixing  
 57 ratio from a certified cylinder (e.g. Praxair, NI NO5MC-A3, 4.88 ( $\pm 5\%$ ) ppmv, Toronto, ON) to  
 58 ensure the NO and NO<sub>x</sub> readings are within  $\pm 1$  ppbv of the true value. Next, a multi-point precision  
 59 check of NO is performed at 40 ppbv, 60 ppbv, and 80 ppbv for 30 min, ensuring a stable signal  
 60 has been achieved. The calibration is considered successful when the analyzer's response to  
 61 changes in NO mixing ratio is linear, with a slope of  $1.00 \pm 0.02$  and  $R^2 > 0.98$ . For multi-point  
 62 precision checks of NO<sub>2</sub>, 40 ppbv, 60 ppbv, and 80 ppbv were produced using gas-phase titration

63 of excess NO with O<sub>3</sub>, again using the GasCal. The criteria for a successful calibration are the  
64 same as described for NO. Conversion efficiency (CE) of NO<sub>2</sub> to NO in the analyzer is the final  
65 parameter to be quantified, and a CE > 96% indicates that the molybdenum catalyst in the analyzer  
66 is operating reliably.

67 Nitrous acid (HONO) was generated using our in-house calibration source based on the reaction  
68 between gas-phase hydrochloric acid (HCl) and a NaNO<sub>2</sub> crystalline film on the surface of PFA  
69 tubing (RS1) at 50% RH to generate gas-phase HONO and to confirm its unity conversion (Lao et  
70 al., 2020).

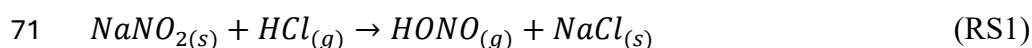

72 In the HONO calibration source, a flow of dry carrier gas (Air Ultra Zero, 99.999%, AI 0.0UZ-K,  
73 Praxair) at 50 cm<sup>3</sup> min<sup>-1</sup> passes through a permeation device (PD) containing HCl solution, heated  
74 to 30-40 °C. Another 50 cm<sup>3</sup> min<sup>-1</sup> passes through a glass impinger containing deionized water to  
75 become saturated with water vapour, so the flow obtains an RH of 50% when combined with that  
76 of the HCl. This HCl-water vapour mixture enters a NaNO<sub>2</sub>-coated PFA reaction device, and  
77 HONO is released by acid displacement. A delivered mixing ratio of 10-100 ppb was found to be  
78 effectively converted, in line with the performance we have previously described in detail.

79 Calibration for the O<sub>3</sub> analyzer involves a multipoint check, after one hour of warmup time to  
80 ensure lamp stability, using 100, 200, 300, and 400 ppbv mixing ratios. The procedure is  
81 considered successful if the slope falls between 0.98 and 1.02, the y-intercept between -2 and 2  
82 ppb, and an overall R<sup>2</sup> > 0.99.

83 The calibration and precision check procedure for the Picarro G2509 involved measuring multiple  
84 known concentrations of GHGs from a calibration cylinder. The calibration cylinder contained a  
85 custom blend of GHGs (4.30 ppm (±5%) N<sub>2</sub>O, 24.8 ppm (±5%) CH<sub>4</sub>, 3587 ppm (±2%) CO<sub>2</sub>),  
86 which was a certified standard grade in an air matrix (Linde Canada Plc; PN: AI CD.4MN1C-A3;  
87 CGA-590). Pure nitrogen and three calibration points at none, 4.5, and 10-times dilution of the  
88 original GHG mixing ratios in the cylinder were delivered to the Picarro analyzer until stable  
89 responses were achieved, in triplicate. The custom-built permeation oven for HONO was also used  
90 to generate known mixing ratios of NH<sub>3</sub> by quantification of bubbler-scrubbed NH<sub>3</sub> using ion  
91 chromatography (Salehpoor and VandenBoer, 2023). A dry 90 cm<sup>3</sup> min<sup>-1</sup> zero air flow was passed  
92 over a PD containing NH<sub>4</sub>OH (30% v/v in 1/8" OD tubing with a 9 cm length). Calibration was

93 performed for mixing ratios of 30 ppbv to 110 ppbv. The dilution of gases was achieved by  
94 combining the flow from a liquid N<sub>2</sub> dewar (Linde Canada Plc, PN: NI LC250-230). The observed  
95 versus returned slopes of 0.99 for N<sub>2</sub>O, 0.99 for CH<sub>4</sub>, 0.98 for CO<sub>2</sub>, and 1.37 for NH<sub>3</sub> when  
96 compared to the known concentrations delivered, thereby demonstrating suitable and stable  
97 calibration of the instrument, as these slopes are within the cylinder or IC mixing ratio  
98 uncertainties.

99

### 100 **S3. Gas handling for chamber filling and emptying challenge experiments**

101 Dilution and analyte gas flow rates were controlled using MFCs (10 L min<sup>-1</sup>, PN:  
102 1179C01314CR1BV, MKS instruments Inc, Andover, MA, US). Mixing ratios of CO<sub>2</sub>, CH<sub>4</sub> and  
103 N<sub>2</sub>O were controlled by dilution of a calibration gas cylinder containing a custom blend of the  
104 three gases (4000 ppm CO<sub>2</sub>, 20 ppm CH<sub>4</sub>, 3.3 ppm N<sub>2</sub>O in zero air from Linde Canada). Known  
105 concentrations of NO and NO<sub>2</sub> were added from their respective calibration gas cylinders (5.9 (±5  
106 %) ppmv of NO in air, PN: NI NO5MC-A3; 4.5 (±5 %) ppmv NO<sub>2</sub> in air, PN: NI NX5MC-AQ;  
107 Linde Canada plc, Toronto, ON). Production of known mixing ratios of O<sub>3</sub> to the chamber was  
108 achieved by combining output from the built-in ozone generator and photometer of the GasCal  
109 into dilution gas at 2 L min<sup>-1</sup>. The 100 cm<sup>3</sup> min<sup>-1</sup> flow of HONO exiting the calibration source was  
110 diluted using ZA and mixing ratios spanning 10-100 ppbv were obtained, with 2 L min<sup>-1</sup> directed  
111 to the experimental setup. For NH<sub>3</sub>, the permeation device output was also diluted with 2 L min<sup>-1</sup>  
112 of zero air to generate a mixing ratio on the order of 30 ppbv.

113 The time response of gases for the fill and empty process was calculated from the time required to  
114 fill the chamber and empty the chamber (Figure S4). It can be described by a single exponential  
115 function for non-reactive gases such as N<sub>2</sub>O, CH<sub>4</sub>, CO<sub>2</sub>, and NO and thus the time response,  $\tau$ , for  
116 the exchange of sample gases volume (Section 2.1; E1-4). The double exponential function was  
117 used for surface-sensitive and reactive gases, such as NO<sub>2</sub>, HONO, and NH<sub>3</sub>, to yield two time  
118 constants,  $\tau_1$  and  $\tau_2$ , the time response towards the exchange of the sample air volume and wall  
119 interactions (S1), respectively (Ellis et al., 2010).

$$120 \quad f(t) = y_0 + A_1 \times \exp\left(\frac{-(t-t_0)}{\tau_1}\right) + A_2 \times \exp\left(\frac{-(t-t_0)}{\tau_2}\right) \quad \text{S1}$$

121 Where  $t_0$  is the start time and  $y_0$  is the offset that represents the measurement baseline level,  $A_1$  and  
 122  $A_2$  are proportionality coefficients from the contribution of the physical processes of sample  
 123 volume exchange in the chamber, and reaction and wall interactions, respectively. The relative role  
 124 of wall interactions or reactions,  $D$ , to the overall transfer of gases through a handling system is  
 125 determined by the contribution of the  $A_2$  term to the sum of both  $A$  terms (S2).

126 
$$D = \left( \frac{A_2}{A_1 + A_2} \right) \times 100\%$$

S2

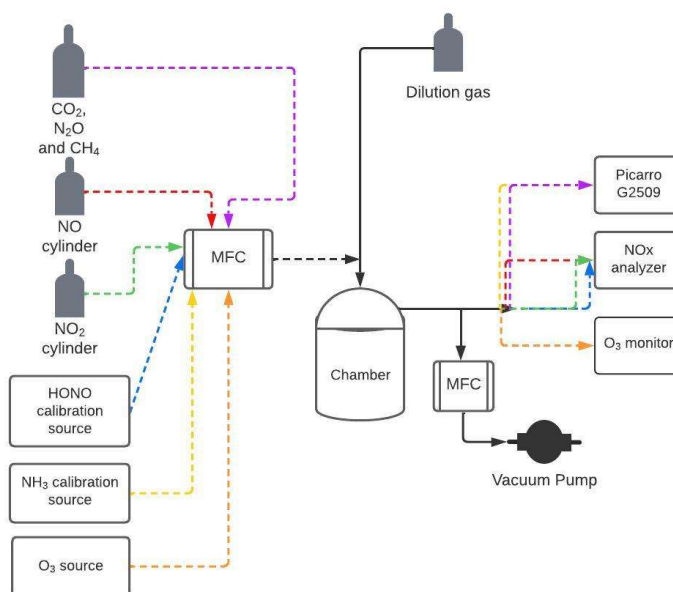

127  
 128 **Figure S4.** Experimental setup to perform fill/empty experiments in the chambers with greenhouse  
 129 gases: CH<sub>4</sub>, CO<sub>2</sub> and N<sub>2</sub>O (purple); N<sub>r</sub> gases NO (red), NO<sub>2</sub> (green), HONO (blue), NH<sub>3</sub> (yellow),  
 130 and O<sub>3</sub> (orange); and dilution gas (black). Dashed arrows show the flow of gases from their  
 131 respective sources for filling experiments to their respective gas analyzers. Emptying experiments  
 132 use dilution gas alone once a steady state of the challenge gas has been obtained in the chamber.

133

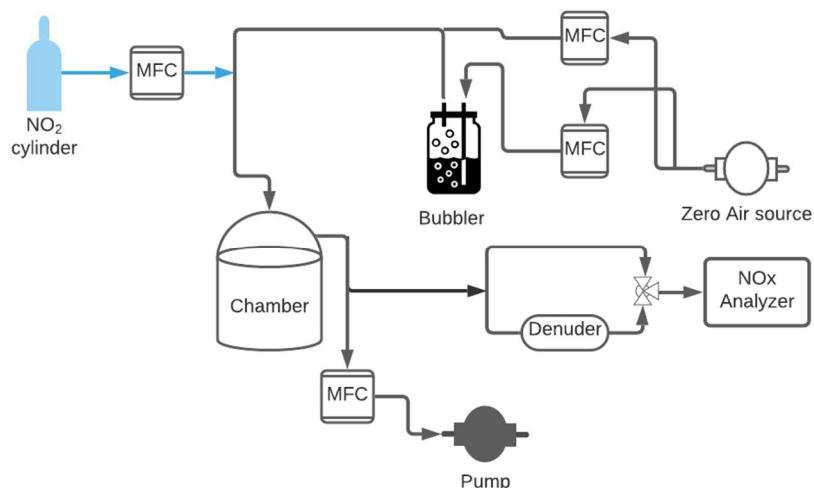

134

135 **Figure S5.** Experimental setup for NO<sub>2</sub> surface loss characterization, where arrows indicate  
 136 direction of gas flows. Characterization of losses or transformation to HONO was made by a  
 137 modified NO<sub>x</sub> analyzer with experimental flow balance by an added MFC and pump.

138

#### 139 **S4. Multiplexer modification tests on gas transfer of N<sub>r</sub> and GHGs**

140 A 2 L min<sup>-1</sup> flow of dry zero air containing 0.058 ppm of N<sub>2</sub>O, 0.57 ppm of CH<sub>4</sub>, and 81.5 ppm of  
 141 CO<sub>2</sub>, was passed through a multiplexer equipped with either PTFE or stainless-steel (SS) valves  
 142 and fittings for 30 min to access relative losses. A separate experiment was performed with 2 L  
 143 min<sup>-1</sup> zero air containing a known concentration of NH<sub>3</sub> (0.41 ppm), which was generated based  
 144 on the method described in Crilley et al. (2023) from a permeation tube containing NH<sub>4</sub>OH.  
 145 Similarly, the transfer efficiency of NO<sub>2</sub> was determined using a calibration cylinder (Linde  
 146 Canada; PN: NI NX5MC-AQ; 5.9 (±5%) ppm) which was combined with a 2 L min<sup>-1</sup> dilution flow  
 147 of dry ZA to achieve a mixing ratio of 54 ppb. All challenge gases were passed through the  
 148 multiplexer equipped with either PTFE or SS valves and PFA or SS fittings, respectively, to assess  
 149 relative losses. All delivered and exiting flows were confirmed to be equal during these tests,  
 150 ensuring no leaks led to a measured loss. The loss percentage in SS fittings and gas handling valves  
 151 was measurable but generally remained below 20%, except for NH<sub>3</sub>, which exhibited a 38%  
 152 reduction. With the modifications, minimal surface loss of GHGs and NO<sub>2</sub> (<1%) was observed  
 153 when using the PFA fittings and PTFE valves, whereas NH<sub>3</sub> exhibited a reduced 11% loss (Figure  
 154 S6).

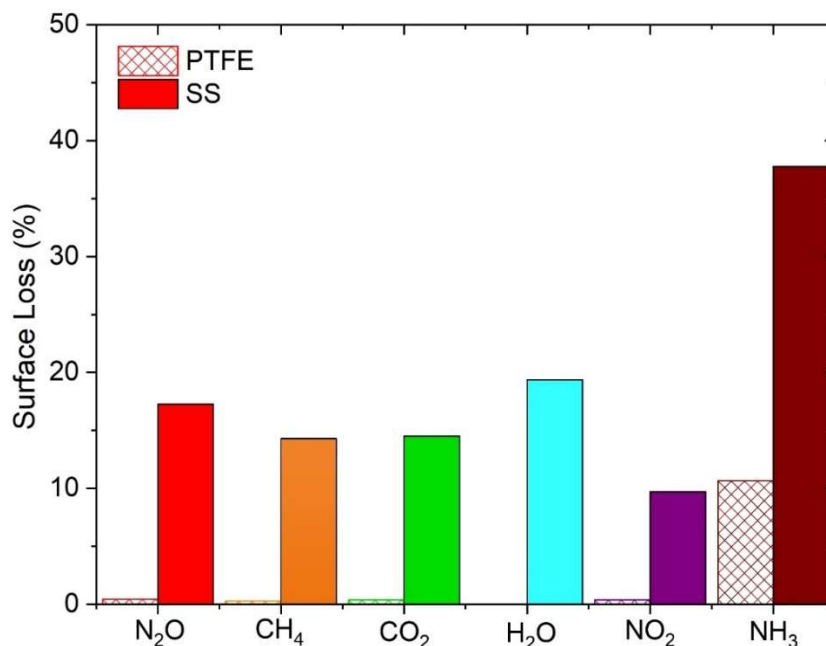

155

156 **Figure S6.** Loss percentage of GHGs (N<sub>2</sub>O, CH<sub>4</sub>, CO<sub>2</sub>,) and N<sub>r</sub>(NO<sub>2</sub>, NH<sub>3</sub>) gases on stainless steel  
 157 fittings than that of a PTFE valve and unions.

158

159 The surface porosity of SS can influence its adsorption capacity for CH<sub>4</sub> through van der Waals  
 160 interaction potentials (Sapag et al., 2010). Previous studies have shown that passivation of the SS  
 161 surface via NO treatment can remove surface iron and promote the formation of chromium-  
 162 enriched oxide films, which in turn govern the surface chemical reactivity toward NO (Ma et al.,  
 163 2020). Furthermore, thin layers of iron oxides formed on SS surfaces can affect the interaction  
 164 with N<sub>2</sub>O and alter its decomposition pathways. Consequently, the combined effects of SS surface  
 165 porosity on CH<sub>4</sub> van der Waals interactions, chromium-oxide passive films influencing NO  
 166 reactivity, and iron-oxide layers acting as active adsorption sites for N<sub>2</sub>O may contribute to up to  
 167 a 20 % loss of these gases on SS surfaces. It is likely that the surface losses observed here for very  
 168 clean SS purged extensively with dry zero air prior to these experiments is passivated over time  
 169 when exposed to ambient air continuously, where the surface adsorption sites are fully occupied  
 170 and losses no longer occur.

171

### 172 **S5. Chamber modification impacts on gas transfer of NO<sub>2</sub> and materials for O<sub>3</sub>**

173 Gas interactions on chamber surfaces during challenge experiments were reversible for all N<sub>r</sub> and  
 174 GHGs tested, except NO<sub>2</sub>, which showed reactive losses. These were characterized by calculating

175 the lost fraction from a small 5 ppb mixing ratio delivered into an unmodified chamber at a high  
176 relative humidity of 83%, followed by modifications to reduce this outcome under these  
177 challenging simulated environmental conditions (Figure S5). Replacement of the brass push-to-  
178 connect fittings delivered the greatest reduction in reactive losses of NO<sub>2</sub>, with modest gains  
179 obtained from covering chamber surfaces with the PFA film (Figure S7). The final lost fraction of  
180 NO<sub>2</sub> in the modified system reported here is technically at the modified NO<sub>x</sub> analyzer detection  
181 limit and therefore represents a conservative upper limit estimate.

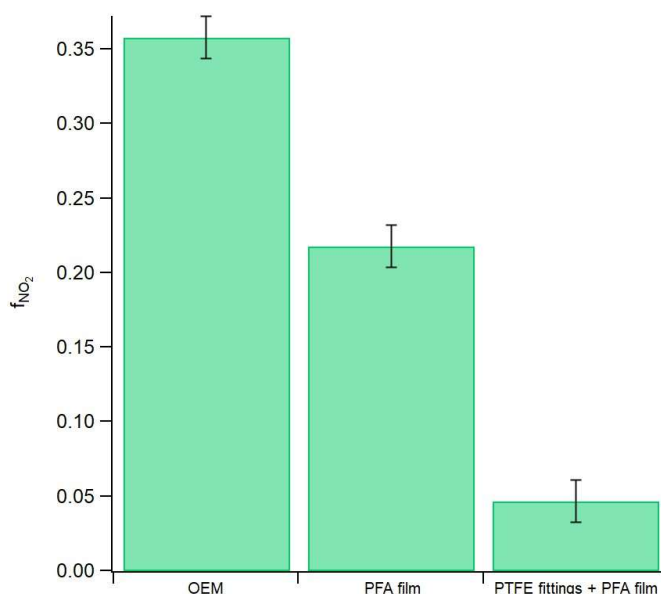

182  
183 **Figure S7.** Average NO<sub>2</sub> loss fraction observed upon addition of 5 ppbv of NO<sub>2</sub> at 83% RH to an  
184 eosAC-LT® chamber (n = 3 each). These trials were conducted in chambers sequentially: without  
185 any modifications (original equipment manufacturer; OEM), following attachment of a PFA film  
186 to the inner surface (PFA film), and replacing brass-lined push to connect fittings with ¼” PTFE  
187 Swagelok bulkhead (PTFE fittings + PFA film).  
188

189 Different RH values were produced inside the flux chamber by combining flows of dry zero air  
190 (ZA) and one saturated with water vapour by transiting a 500 mL Pyrex impinger filled with  
191 deionized water (e.g. equal 1 L min<sup>-1</sup> flows combine to an RH of 50%). A high-precision, research-  
192 grade humidity probe (HMP60, Vaisala Oyj, Finland; ± 3% at 0 - 90% RH, ± 5% at 90 - 100%  
193 RH) was connected to the chamber to confirm the set point by measurement in the chamber. The  
194 flow from an NO<sub>2</sub> calibration cylinder (Linde Canada; PN: NI NX5MC-AQ; 5.9 (±5%) ppm) was  
195 adjusted using an MFC and combined with a dilution flow of ZA to achieve mixing ratios of 5, 7  
196 and 10 ppbv. The total flow rate for these experiments was 2.0 L min<sup>-1</sup> and a vacuum pump (62.3

197 L min<sup>-1</sup>, PN: UZ-07061-22, Gast Manufacturing Inc., Benton Harbor, MI, USA) with an MFC (10  
198 L min<sup>-1</sup>, PN: 1179C01314CR1BV, MKS instruments Inc, Andover, MA, US) was used to make up  
199 the sampling flow beyond the 0.5 L min<sup>-1</sup> of the NO<sub>x</sub> analyzer. The same flow difference stated  
200 above was maintained in the chamber, using the built-in vent.

201 Prior to O<sub>3</sub> addition, in the characterization experiments, the chamber was flushed with ZA until  
202 the background level of O<sub>3</sub> was at the instrument detection limits. Three mixing ratios of O<sub>3</sub> of  
203 150, 200 and 250 ppb generated by a GasCal 1100 dilution calibrator with integrated O<sub>3</sub> generator  
204 and photometer (American Ecotech, Warren, RI) and added to the chamber for 60 mins or until a  
205 constant concentration was reached. Two replicate runs of each addition level were performed and  
206 delivered mixing ratios were confirmed from bypassing the chambers with just the 15 m gas  
207 handling lines.

208 Ozone is known to undergo heterogeneous surface reactions, particularly on materials like glass,  
209 metals, or polymers (Plake et al., 2015). These surfaces often contain reactive sites such as  
210 hydroxyl groups or adsorbed water molecules that can catalyze the decomposition of O<sub>3</sub> into  
211 molecular oxygen (O<sub>2</sub>) and other byproducts (George et al., 2015). Adsorption of O<sub>3</sub> on chamber  
212 surfaces is another potential pathway for loss. When O<sub>3</sub> molecules interact with surfaces, they may  
213 undergo a reaction if the materials are not inert. The use of PFA here was intended to benefit the  
214 transfer of O<sub>3</sub>, yet despite its high chemical inertness, low reactivity, and resistance to the uptake  
215 of many chemicals from gas samples, the subsequent O<sub>3</sub>-driven surface reactions are still  
216 substantial (Ebnesajjad, 2017). This is likely because, over time, reactive substances from sampled  
217 air accumulated through adsorption on the PFA film and/or its defect sites, thereby reducing its  
218 effectiveness. The same issue is well-known for PFA tubing used in standard air quality monitoring  
219 and is a common maintenance need for O<sub>3</sub> analyzer inlets. Further, physical wear or surface aging  
220 might alter the material surface through product formation or exposure of new reaction sites, which  
221 makes it less resistant to further reaction with O<sub>3</sub>, and therefore increases the rate of loss over time.  
222 This is the case in our aged PFA film results, which emphasizes the importance of regular  
223 replacement of the film as part of the N<sub>r</sub> system maintenance and that quality control procedures  
224 characterizing the chamber material performance with respect to O<sub>3</sub> will provide the highest  
225 accuracy of experimental results.

226

227 **S6. Agricultural soil samples used for laboratory  $N_r$  emission measurements**

228 A systematic method was used to collect soil samples from an agricultural field to avoid sampling  
229 bias, assuming there is no topographic reason for differences in soil properties and nutrient content  
230 within the specified plot area. The total field area was divided into eight identical plots (A-H) of  
231  $10,800 \text{ m}^2$  ( $120 \text{ m} \times 90 \text{ m}$ ). Soil samples were collected from four random coordinates within each  
232 plot, assuming that samples collected within  $1 \text{ m}^2$  were homogeneous. An approximate 1 L soil  
233 core  $\sim 15 \text{ cm}$  deep was collected with a clean shovel into a pre-labelled clean Ziploc bag. All soil  
234 samples were stored below  $10 \text{ }^\circ\text{C}$  and transported to the laboratory within a week.

235 Four within-plot samples were collected to better approximate soil properties and nutrient content  
236 across the entire field. A total of 32 soil samples were collected from the field, where three of the  
237 randomly collected within-plot samples were combined generate a plot scale sample, and one  
238 sample within each plot was randomly selected to be combined into a pooled sample representative  
239 of the field scale. For the purposes of this work, we assessed the emissions of NO, NO<sub>2</sub>, and HONO  
240 from duplicate pooled samples and from Plot D within this sampling experiment (Figure S8).

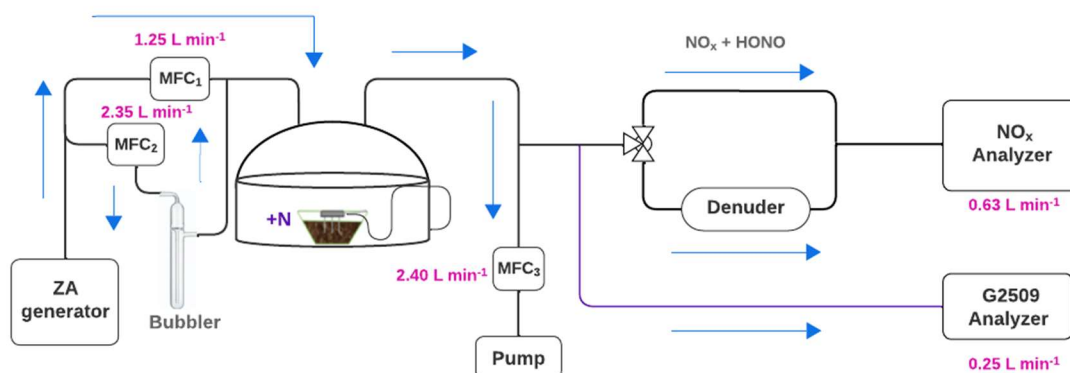

241  
242 **Figure S8.** Schematic representation of a dynamic chamber system to measure NO, NO<sub>2</sub>, and  
243 HONO fluxes with a modified NO<sub>x</sub> analyzer (black lines) and NH<sub>3</sub> and N<sub>2</sub>O for soil amended with  
244 fertilizer using G2509 (purple line). Zero air and humid airflow rates were set using MFC 1 and  
245 MFC 2, for a total of  $3.6 \text{ L min}^{-1}$  going into the chamber. The three-way valve either sends  
246 headspace air directly to the NO<sub>x</sub> analyzer (measures NO and NO<sub>2</sub>+HONO), or via the Na<sub>2</sub>CO<sub>3</sub>-  
247 coated denuder (measures NO, and NO<sub>2</sub>). Blue arrows indicate the flows throughout the  
248 experimental setup, with flow rates provided in pink text.

249  
250 Soil NH<sub>3</sub> and N<sub>2</sub>O, along with NO, NO<sub>2</sub>, and HONO, were measured when the pooled soil sample  
251 was amended with four different nitrogen salts (i.e., AN, urea, ABC, AC; Table S1, Figure 4). For

252 each experiment, 350 g of soil was used, and a corresponding fertilizer solution equivalent to 100  
253 kg N ha<sup>-1</sup> was added. Additional experimental details are provided in Section 2.5.1 of the main  
254 manuscript. The interpretation of the full set of experimental results will be presented in a  
255 forthcoming publication on field-scale heterogeneity of N<sub>r</sub> emissions and comments on the  
256 assumption that individual samples represent these processes across fields with similar  
257 physicochemical properties.

**Table S1.** The average and integrated flux for soil treated with 4 different nitrogen salts (urea, ammonium bicarbonate (ABC), ammonium carbonate (AC), and ammonium nitrate (AN)). Average fluxes were calculated over the entire experimental cycle. Integrated fluxes were obtained using the trapezoidal rule. Standard deviations reflect the variability in fluxes measured across the time points for the single sample analyzed per treatment. Replicates of urea (~40 hours) and AN (~5 hours) were analyzed with only the modified NO<sub>x</sub> analyzer, thus lacking data for N<sub>2</sub>O and NH<sub>3</sub> (represented by -).

| Soil sample | Avg Flux ( $\mu\text{g N m}^{-2} \text{hr}^{-1}$ ) |                 |               |                  |                 | Integrated flux ( $\mu\text{g N m}^{-2}$ ) |                 |      |                  |                 |
|-------------|----------------------------------------------------|-----------------|---------------|------------------|-----------------|--------------------------------------------|-----------------|------|------------------|-----------------|
|             | NO                                                 | NO <sub>2</sub> | HONO          | N <sub>2</sub> O | NH <sub>3</sub> | NO                                         | NO <sub>2</sub> | HONO | N <sub>2</sub> O | NH <sub>3</sub> |
| Urea        | 0.1 ± 0.06                                         | 0.03 ± 0.01     | 0.002 ± 0.004 | 9 ± 3            | 1 ± 0.5         | 230                                        | 120             | 1    | 32400            | 3700            |
| ABC         | 0.03 ± 0.01                                        | 0.1 ± 0.01      | 0.03 ± 0.02   | 7 ± 6            | 20 ± 7          | 90                                         | 300             | 90   | 25300            | 85900           |
| AC          | 0.03 ± 0.004                                       | 0.2 ± 0.03      | 0.01 ± 0.01   | 3 ± 2            | 20 ± 3          | 90                                         | 500             | 1    | 9600             | 63700           |
| *AN         | 1 ± 0.1                                            | 1 ± 0.1         | 1 ± 0.02      | -                | -               | 50                                         | 50              | 40   | -                | -               |

## 1 S7. Analytical solutions to soil reactive gas flux determination with a two-chamber setup

2 For a single chamber system, S3 can be used to calculate the gas flux to and from an enclosed  
3 surface. Each of these terms and their units is provided in Section 2.6 of the main manuscript.

$$4 \quad V \frac{dC_{\text{cham}}(t)}{dt} = (A \cdot F_{\text{soil}}(t)) + (Q_{\text{in}} \cdot c_{\text{in}}(t)) - (Q_{\text{out}} \cdot c_{\text{out}}(t)) + (V \cdot R(t)) \quad \text{S3}$$

5 Where  $V$  is the volume of the chamber ( $\text{m}^3$ ),  $A$  is the surface area ( $\text{m}^2$ ) enclosed by the chamber  
6 and governing the gas flux;  $Q_{\text{out}}$  is the volumetric flow rate of air exiting the chamber ( $\text{m}^3 \text{ s}^{-1}$ );  $c_{\text{m}}(t)$   
7 and  $c_{\text{r}}(t)$  are target gas concentrations within the measurement and reference chamber ( $\text{mol m}^{-3}$ ),  
8 respectively;  $c_{\text{in}}$  and  $c_{\text{out}}$  represent their corresponding rates of change ( $\text{mol m}^{-3} \text{ s}^{-1}$ ); and  $F_{\text{net}}$  is the  
9 resulting net gas flux per unit area ( $\text{mol m}^{-2} \text{ s}^{-1}$ ). The terms  $R_{\text{r}}$  denote the instantaneous chemical  
10 production or loss rate expressed in units of  $\text{mol m}^{-3} \text{ s}^{-1}$  for consistency.

11 In our field pilot study, the measurement and reference chambers were installed on clay soil using  
12 serrated collars inserted about 10 cm deep into pre-dug circles (30 cm diameter, 20 cm depth)  
13 between crop rows of senescing soybeans after removing debris. Collars were left to settle for over  
14 24 hours before the chambers were bolted securely to ensure a gas-tight seal. Flux observations  
15 were made for two weeks from 02-16 September 2022, during a period when daytime air  
16 temperatures were regularly over  $25 \text{ }^\circ\text{C}$ , and there were no instances of rain. During the second  
17 week of observations, a fertilizer addition of  $25 \text{ kg N ha}^{-1}$  was made by broadcasting urea in the  
18 chamber, followed by applying clean water to simulate 2.5 cm (1") of rainfall.

19 In our sampling setup, there is a negligible concentration of any target gas in the inflow ( $c_{\text{in}}(t) \approx 0$ )  
20 due to the use of ultra-pure zero air or nitrogen, and the air is actively mixed inside the chamber  
21 with its fan, such that  $c_{\text{chamb}} = c_{\text{out}}$ , so the equation simplifies to Equation S4. For non-steady-  
22 state conditions, where the concentration inside the chamber is changing over time, the time-  
23 varying nature of the sources and sinks needs to be accounted for. The instantaneous equation that  
24 describes the behaviour over an interval  $[t_1, t_2]$  is the integral in Equation S5.

$$25 \quad V \frac{dC_{\text{cham}}(t)}{dt} = (A \cdot F_{\text{soil}}(t)) - (Q_{\text{out}} \cdot c_{\text{cham}}(t)) + (V \cdot R(t)) \quad \text{S4}$$

$$26 \quad \int_{t_1}^{t_2} V \frac{dC_{\text{cham}}(t)}{dt} dt = \int_{t_1}^{t_2} [(A \cdot F_{\text{soil}}(t)) - (Q_{\text{out}} \cdot c_{\text{cham}}(t)) + (V \cdot R(t))] dt \quad \text{S5}$$

27 Assuming the soil flux,  $F_{\text{soil}}$  ( $\text{mol m}^{-2} \text{s}^{-1}$ ), is constant over the time interval  $[t_1, t_2]$  is a reasonable  
 28 assumption for experimental setups where the environmental conditions and, where relevant, soil-  
 29 plant activity, do not change substantially over short periods of a few to tens of minutes (Pape et  
 30 al., 2009). Rearranging the expression for Equation S5, a flux can be calculated using Equation  
 31 S6.

$$32 \quad F_{\text{soil}} = \frac{V\Delta C_{\text{cham}} + Q_{\text{out}} \int_{t_1}^{t_2} c_{\text{cham}}(t) dt - \int_{t_1}^{t_2} R(t) dt}{A(t_2 - t_1)} \quad \text{S6}$$

33 The volumetric mixing ratio (Equation S7) is often the unit of measurement for many gas analyzers  
 34 and defined as the number of moles of the gas divided by the number of moles of dry air. The  
 35 mixing ratio  $X$  is dimensionless and provides a way to express gas concentrations independently  
 36 of changes in temperature or pressure.

$$37 \quad X = \frac{n_{\text{gas}}}{n_{\text{air}}} \quad \text{S7}$$

38 We can then write the molar concentration,  $c$  ( $\text{mol m}^{-3}$ ), in the form of volumetric mixing ratio  
 39 using Equation S8:

$$40 \quad c_{\text{chamber}} = X_{\text{out}} \times \rho_d \quad \text{S8}$$

41 Here,  $\rho_d$  ( $\text{mol m}^{-3}$ ) is the molar density of the air. The total pressure  $P$  is equal to atmospheric  
 42 pressure, such that by using the ideal gas law, we can define the density of air using Equation S9:

$$43 \quad \rho_d = \frac{P}{R \cdot T} \quad \text{S9}$$

44 Where  $P$  (Pa) is the pressure,  $R$  ( $\text{J mol}^{-1} \text{K}^{-1}$ ) is the universal gas constant, and  $T$  (K) is the absolute  
 45 temperature. In Equation S9 it is assumed that atmospheric air behaves as an ideal gas, which is a  
 46 reasonable approximation under typical environmental conditions, even at the Earth's surface. The  
 47 resulting molar concentrations can then be calculated and used in the flux determinations as  
 48 presented in Equations 6 and 7 in the main manuscript.

### 49 **S7.1 Dynamics and physical corrections from reference and measurement chambers**

50 In environmental and experimental settings where gas flux is measured, it is important to capture  
 51 the rate at which gas concentrations change over time. This rate reflects the net outcome from both  
 52 gas emission and deposition occurring simultaneously, influenced by the surface under study,

53 temperature, pressure, flow, and surface interactions (Equation S10). The RC (r), which operates  
 54 under identical conditions to the MC (m) but excludes the surface under study by isolating it  
 55 beneath the PFA film, takes into account the environmental and surface effects, such that its  
 56 observed flux rate is described by Equation S11. To isolate the effects of the surface under study  
 57 from reactions taking place in the atmospheric sample and on the chamber surfaces, the rate of  
 58 change in the RC is subtracted from that in the MC, yielding the net flux through Equation S12.

$$59 \quad F_m = \text{surface under study} + \text{environmental and chamber effects} \quad \text{S10}$$

$$60 \quad F_r = \text{environmental and chamber effects} \quad \text{S11}$$

$$61 \quad F_{net} = F_m - F_r \quad \text{S12}$$

62 The net rate of change can now be used to calculate the molar flux by substituting it into Equation  
 63 S6 to arrive at Equation S13, which is the core of Equation 6.

$$64 \quad F_{net} = \frac{V}{A} \left( \frac{\Delta C_m}{\Delta t_m} - \frac{\Delta C_r}{\Delta t_r} \right) + \frac{Q_{out}}{A} \left( \frac{\int_{t_{1m}}^{t_{2m}} c_m(t) dt}{\Delta t_m} - \frac{\int_{t_{1r}}^{t_{2r}} c_r(t) dt}{\Delta t_r} \right) - \frac{V}{A} \left( \frac{\int_{t_{1m}}^{t_{2m}} R_m(t) dt}{\Delta t_m} - \frac{\int_{t_{1r}}^{t_{2r}} R_r(t) dt}{\Delta t_r} \right)$$

$$65 \quad \text{S13}$$

66 The closure period of the two chambers is matched to facilitate an accurate correction of the  
 67 kinetics and surface interactions. The calculated flux from the surface under study is therefore  
 68 corrected for background and environmental effects, reducing systematic bias from gas reactivity.

69 Last, we introduce a flux attenuation factor ( $\lambda$ ; Equation S14) to correct for partial transmission of  
 70 a targeted reactive gas due to adsorption to chamber walls and gas handling lines during a  
 71 measurement cycle ( $t_1$ - $t_2$ ). This factor needs to be determined empirically through calibration  
 72 experiments, like those presented in Figure 2, where the loss of the surface-active gas is quantified  
 73 relative to the transmission of inert gas during both filling and emptying processes.

$$74 \quad \lambda = \frac{\int_{t_1}^{t_2} \left( \frac{dX}{dt} \right)_{theoretical} dt}{\int_{t_1}^{t_2} \left( \frac{dX}{dt} \right)_{measured} dt} \quad \text{S14}$$

75 We can account for  $\lambda$  in Equation S13, to get the molar flux of gas inside the chamber, which  
 76 accounts for flux loss (Equation S15) by scaling the equation directly to arrive at the full form  
 77 presented as E6 in the main manuscript.

$$F_{\text{net}} = (\lambda) \cdot \left( \frac{V}{A} \left( \frac{\Delta C_m}{\Delta t_m} - \frac{\Delta C_r}{\Delta t_r} \right) + \frac{Q_{\text{out}}}{A} \left( \frac{\int_{t_{1m}}^{t_{2m}} c_m(t) dt}{\Delta t_m} - \frac{\int_{t_{1r}}^{t_{2r}} c_r(t) dt}{\Delta t_r} \right) - \frac{V}{A} \left( \frac{\int_{t_{1m}}^{t_{2m}} R_m(t) dt}{\Delta t_m} - \frac{\int_{t_{1r}}^{t_{2r}} R_r(t) dt}{\Delta t_r} \right) \right)$$

S15

## 78 S7.2 Chemical corrections from reference and measurement chambers

79  
80  
81 For reactive species impacting our  $N_r$  suite – mainly NO, O<sub>3</sub>, and NO<sub>2</sub> – flux values can be  
82 attenuated or enhanced due to the reaction of NO with O<sub>3</sub> (RS2). We show below (Figure S9) that  
83 the photolysis of NO<sub>2</sub> and HONO is negligible due to the high-energy photon cut-off of acrylic  
84 (<400 nm threshold) (RS3). Nevertheless, we include the NO<sub>2</sub> photolysis term in the rate  
85 expression for completeness, noting that under our field conditions its contribution (Section  
86 S7.2.1) is within the noise of the NO<sub>2</sub> fluxes. The rate of reactions RS2 and RS3 for NO<sub>2</sub>, therefore,  
87 can be expressed by Equation S16.

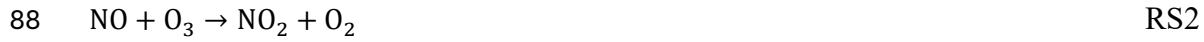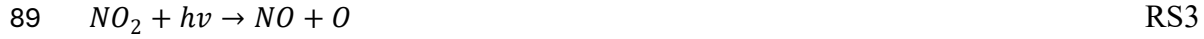

$$90 \frac{d[\text{NO}_2]}{dt} = k_{\text{NO}+\text{O}_3} [\text{NO}][\text{O}_3] - J_{\text{NO}_2} [\text{NO}_2] \quad \text{S16}$$

91 The total change in the concentration due to reaction over a cycle can be expressed by integrating  
92 the rate equation over the cycle duration, as the start time ( $t_0$ ) and end time ( $t$ ) are known, therefore  
93 replacing the term  $R$  in Equations S15 (and 6 in the main manuscript) with the expression in  
94 Equation S17. Under our chamber conditions, the integrated photolysis contribution was smaller  
95 than the measurement uncertainty of the NO<sub>2</sub> fluxes (Section S7.2.1), and therefore it was not  
96 included as an explicit term in Equation S17.

$$97 \int_{t_0}^t R dt = \Delta[\text{NO}] = \Delta[\text{O}_3] = -\Delta[\text{NO}_2] = -\int_{t_0}^t k [\text{NO}(t)][\text{O}_3(t)] dt \quad \text{S17}$$

98 Where the  $R$  is the loss rate  $R \leq 0$  ( $R < 0$ ) and the simultaneous production  $R \geq 0$  for NO<sub>2</sub> ( $R \geq 0$ ). For  
99 the kinetic determination, number density of the gases (molec cm<sup>-3</sup>) is used to track the chemical  
100 transformations over time, but instrumentation typically measures mixing ratios. If temperature  
101 and pressure are measured alongside target gases in the dynamic chambers, then using Equations  
102 S8 and S9, the reaction-corrected flux based on measured mixing ratios can be calculated using  
103 Equation S18.

$$\begin{aligned}
104 \quad F_{\text{net}} &= \lambda \cdot \frac{P_{\text{air}}}{R \cdot T} \cdot \left( \frac{V}{A} \left( \frac{\Delta X_m}{\Delta t_m} - \frac{\Delta X_r}{\Delta t_r} \right) + \frac{Q_{\text{out}}}{A} \left( \frac{\int_{t_{1m}}^{t_{2m}} X_m(t) dt}{\Delta t_m} - \frac{\int_{t_{1r}}^{t_{2r}} X_r(t) dt}{\Delta t_r} \right) - \frac{V}{A} \left( \frac{P_{\text{air}}}{R \cdot T} \right) \left( \frac{\int_{t_{1m}}^{t_{2m}} k \cdot X_{\text{NO}_m}(t) \cdot X_{\text{O}_3m}(t) dt}{\Delta t_m} - \right. \\
105 \quad &\left. \frac{\int_{t_{1r}}^{t_{2r}} k \cdot X_{\text{NO}_r}(t) \cdot X_{\text{O}_3r}(t) dt}{\Delta t_r} \right) \right) \quad \text{S18}
\end{aligned}$$

106 Where, again,  $P_{\text{air}}$  (Pa) the atmospheric pressure inside the measurement and reference chambers,  
107  $R$  ( $\text{J mol}^{-1} \text{K}^{-1}$ ) is the gas constant, and  $T$  (K) is the temperature inside the RC and MC. For non-  
108 reactive gases like  $\text{CO}_2$ ,  $\text{CH}_4$ , and  $\text{N}_2\text{O}$ , there is no reaction term, and the flux can be described  
109 simply using Equation S19 as below, which is presented as E7 in the main manuscript.

$$110 \quad F_{\text{net}} = \lambda \cdot \frac{P_{\text{air}}}{R \cdot T} \cdot \left( \frac{V}{A} \left( \frac{\Delta X_m}{\Delta t_m} - \frac{\Delta X_r}{\Delta t_r} \right) + \frac{Q_{\text{out}}}{A} \left( \frac{\int_{t_{1m}}^{t_{2m}} X_m(t) dt}{\Delta t_m} - \frac{\int_{t_{1r}}^{t_{2r}} X_r(t) dt}{\Delta t_r} \right) \right) \quad \text{S19}$$

111  
112 **S7.2.1 Losses of  $\text{NO}_2$  or HONO due to photolysis within transparent chambers**  
113 The fraction of  $\text{NO}_2$  or HONO lost due to photolysis depends on the photons transmitted through  
114 the chamber material (Figure S9). The photolysis rate is estimated here under a worst-case scenario  
115 with respect to our field observations, using actinic flux data collected for Lambton County,  
116 Ontario, Canada, at 12:00 PM local time on September 10, 2022, under clear sky conditions. The  
117 effective photolysis rate constant within the chamber was calculated to be  $2.62 \times 10^{-4} \text{ s}^{-1}$ , using  
118 Equation S20.

$$120 \quad J = \int [\sigma(\lambda) \cdot \Phi(\lambda) \cdot F(\lambda) \cdot T(\lambda)] d\lambda \quad \text{S20}$$

121  
122 Where  $\sigma(\lambda)$  is the absorption cross-section of  $\text{NO}_2$  ( $\text{cm}^2 \text{ molecule}^{-1}$ ),  $\Phi(\lambda)$  is the quantum yield  
123 (dimensionless; 0-1),  $F(\lambda)$  is the actinic flux ( $\text{photons cm}^{-2} \text{ s}^{-1} \text{ nm}^{-1}$ ), and  $T(\lambda)$  is the transmission  
124 of the acrylic chamber material (dimensionless) at wavelength  $\lambda$  (dimensionless; 0-1).

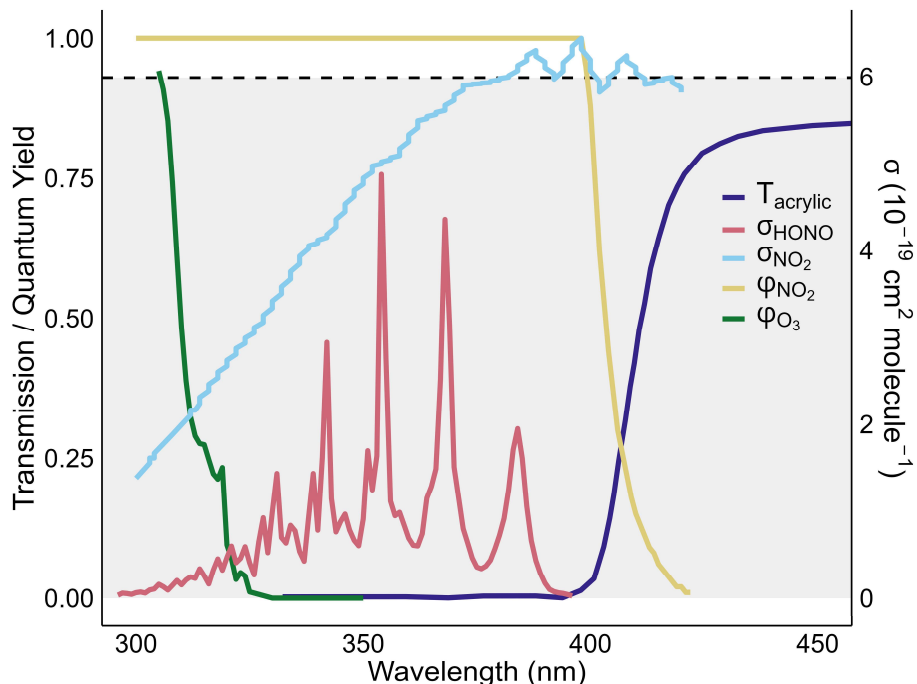

125  
 126 **Figure S9.** Transmission of light through the chamber and quantum yields for photolysis of O<sub>3</sub>  
 127 and NO<sub>2</sub>, along with the absorption cross section of NO<sub>2</sub> and HONO, as a function of wavelength.  
 128 The shaded region denotes the manufacturer-specified minimum transmission ( $\geq 93\%$ ) for the PFA  
 129 film. Note the negligible overlap for photodissociation. The acrylic effectively blocks wavelengths  
 130 below approximately 400 nm, meaning the photolysis rate of NO<sub>2</sub> is the only one impacted by a  
 131 chamber constructed from this material.

132  
 133 Using this attenuated loss rate in a kinetic model, we find that at most 14% of the initial NO<sub>2</sub>  
 134 concentration is lost due to photolysis within the chamber in the first 10 minutes, and 37% within  
 135 30 minutes (Figure S10, blue trace). This rate of photolysis significantly reduces the NO<sub>2</sub> mixing  
 136 ratio within the chamber environment. The wavelength cut-off of polyacrylate limits the  
 137 penetration of shorter wavelengths, which are more effective in driving NO<sub>2</sub> photolysis, so the  
 138 overall rate is slowed inside the chamber compared to ambient conditions (Figure S10, red trace).  
 139 Despite this, within the initial 30-minute timeframe (Figure S10, vertical dashed line), the change  
 140 in the fraction of NO<sub>2</sub> lost is relatively small due to the dynamic nature of the chamber headspace  
 141 (i.e. due to continuous sampling and dilution flows), allowing for a reasonable linear  
 142 approximation of the curve. The photolytic loss of HONO is much more impacted by the cutoff  
 143 wavelength of the polyacrylate chamber lid, to the point where it is not substantially lost due to  
 144 photolysis. As shown in Figure S9, the HONO absorption cross-section lies almost entirely below  
 145 the  $\sim 400$  nm transmission cutoff of the chamber lid. This spectral mismatch means that HONO  
 146 photolysis is effectively suppressed inside the chamber, unlike NO<sub>2</sub>, which still absorbs within the

147 transmitted range. Consequently, chamber-derived HONO fluxes are not biased by photolytic loss,  
148 making their interpretation simpler than NO<sub>2</sub>.

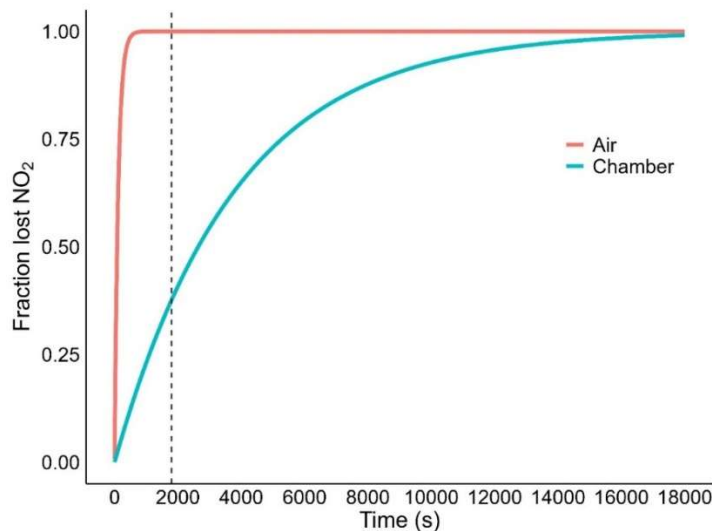

149  
150 **Figure S10.** Fraction of NO<sub>2</sub> lost due to photolysis over time, both inside the chamber (blue line)  
151 and in ambient air (red line). The vertical dashed line indicates the 30-min mark, where an initial  
152 linear approximation of the loss rate can be applied.

153 This simplification yields an estimated initial photolysis rate loss of approximately 1% per minute  
154 for NO<sub>2</sub> over the initial 30-minute measurement cycle and effectively 0% per minute for HONO  
155 under chamber conditions due to the cutoff wavelength. This linear approximation is only valid  
156 for this kind of short initial period. Beyond 30 minutes, the overall trend exhibits a steeper  
157 exponential decay, characteristic of the NO<sub>2</sub> photolysis process. This photolysis contribution is  
158 included within the reaction term (Equation S16). Its effect (~1% min<sup>-1</sup> maximum at noon under  
159 clear-sky conditions) is smaller than the uncertainties of the NO<sub>2</sub> flux measurements, so it is not  
160 explicitly propagated into the flux equations in this work.

161  
162 **S7.3 Surface interaction correction using the attenuation factor ( $\lambda$ )**  
163 Accurate quantification of trace gas fluxes using dynamic chamber systems also requires  
164 correction for attenuation caused by gas-wall interactions and the associated sensor response  
165 delays. These effects can significantly suppress the measured accumulation rate of reactive species  
166 within the closed chamber, particularly for compounds with strong surface affinity, such as NH<sub>3</sub>,  
167 NO<sub>2</sub>, and HONO, requiring the use of the attenuation factor ( $\lambda$ ; Equation S14).

168 The attenuation factor is derived from our controlled delivery experiments that simulated two  
 169 sequential measurement scenarios: a filling phase, where gas is introduced and accumulates within  
 170 the chamber, and an emptying phase, where the chamber is flushed and the gas signal declines  
 171 (Figure 4). For an ideal gas without wall interactions, the integrated difference between theoretical  
 172 and observed concentrations within a single chamber should approach zero, and  $\lambda$  would be  
 173 approximately one. However, as shown in Figure S11, all three gases exhibited surface  
 174 interactions, with  $\text{NH}_3$  showing the largest deviation from an inert gas model.

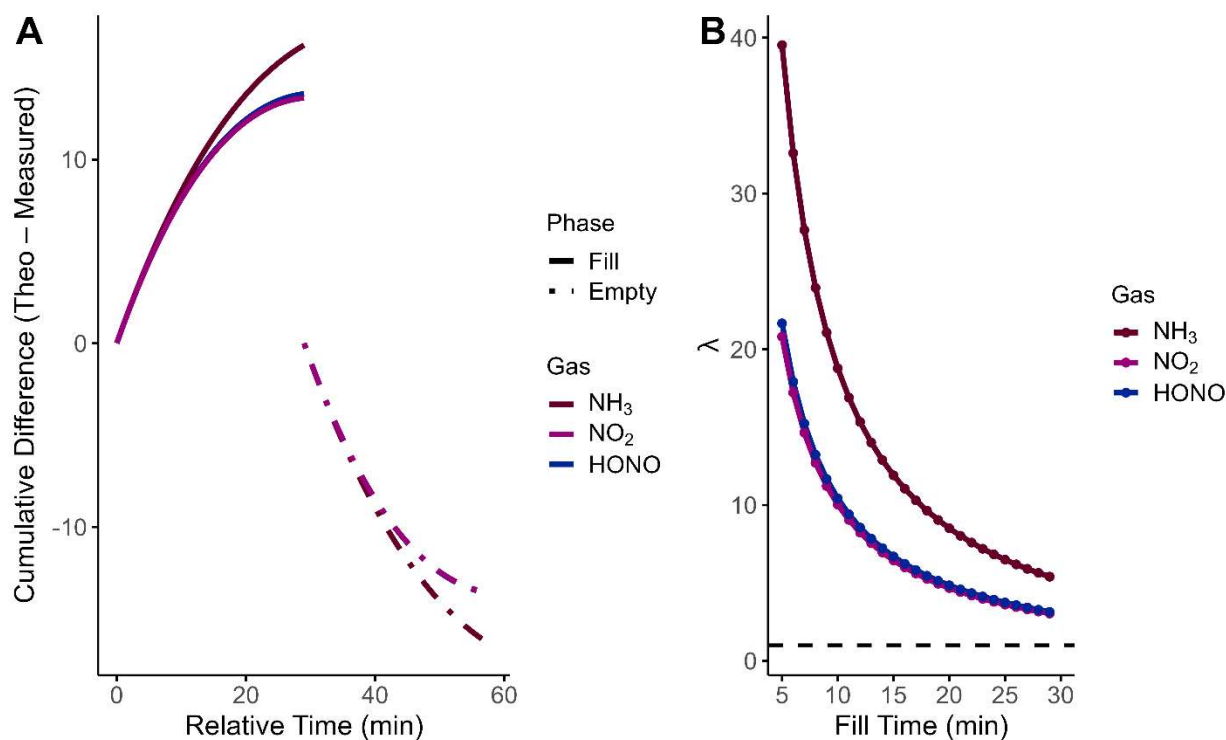

175  
 176 **Figure S11.** (A) Cumulative integration of the difference between inert and measured gas  
 177 concentrations for  $\text{NH}_3$ ,  $\text{NO}_2$ , and HONO over a 30-minute filling and emptying period and (B)  
 178 resulting  $\lambda$  values for modified chambers, 15 m PFA lines, and gas analyzers as a function of filling  
 179 time with a dashed line at one corresponding to the transmission of an inert gas. Theoretical  
 180 concentrations represent expected values from an inert gas without attenuation, while measured  
 181 values reflect signal loss due to gas-wall interactions. Solid lines correspond to the filling phase;  
 182 dashed lines represent the emptying phase, together representing a full in situ measurement cycle.  
 183 These illustrate the time-dependent and nonlinear attenuation that underlies the empirical  
 184 calculation of  $\lambda$ . Note that due to observations switching to the RC, the emptying phase does not  
 185 impact the value of  $\lambda$  applied during field use.

186

187 When filling, the gas accumulates in the chamber, with a strong initial attenuation that diminishes  
188 over time as the surfaces passivate. Conversely, adsorbed gases from surface passivation may  
189 partially desorb during emptying, offsetting some of the losses observed during filling. Two  
190 respective  $\lambda$  values can be derived and considered separately by integrating the filling and  
191 emptying concentration-time series independently.

192 Where a single-chamber is used to study an experimental system, the filling- and emptying-phase  
193 effects offset one another, masking the attenuation as all the surface interacting molecules are  
194 eventually transferred to the gas analyzer. In field applications with a dual chamber approach in  
195 use, this symmetry is lost because the measurement chamber accumulates a real emission flux  
196 during a defined closure period, while the reference chamber does not. Hence, an empirical  
197 calculation of  $\lambda$  is needed which compensates for the attenuation in both the accumulation and  
198 depletion of the target gas (Table S7). For  $\text{NH}_3$ , the fill-phase difference was 16.23, dividing the  
199 expected theoretical accumulation by this measured accumulation yields a  $\lambda_{\text{fill}}$  of 5.40, while the  
200 empty-phase difference was  $-16.44$ , with a  $\lambda_{\text{empty}}$  of 0.36. Unsurprisingly,  $\text{NO}_2$  and HONO  
201 followed a similar trend as we also noted their surface interactions, with  $\lambda_{\text{fill}}$  values of 3.04 and  
202 3.14 resulting from our characterizations, respectively, and  $\lambda_{\text{empty}}$  values near 0.40. Uncertainties  
203 in  $\lambda$  were quantified from three replicate fill-empty characterizations under identical laboratory  
204 conditions, yielding one-sigma deviations of  $\pm 0.21$  for  $\text{NH}_3$ ,  $\pm 0.02$  for  $\text{NO}_2$ , and  $\pm 0.02$  for HONO.  
205 These values therefore represent attenuation behavior for a pristine or lightly used chamber system.

206 From a physical and mathematical standpoint, attenuation reduces all concentration-dependent  
207 components of the flux (accumulation/depletion, dilution, and reaction) by the same factor. As a  
208 result, the attenuation factor  $\lambda$  scales the entire net-flux expression rather than only the  
209 accumulation term. Because  $\lambda$  depends on surface condition, extended field use or residue  
210 accumulation may alter its value, and periodic re-characterization is recommended to maintain  
211 accurate flux estimates.

212

213

214

215

216

217 **Table S7.** The cumulative integrated differences between theoretical and measured values from  
 218 Figure S11 for both the filling and emptying phases, and the resulting  $\lambda$  values. While the signed  
 219 fill and empty values appear approximately balanced, their directional impact differs, and the  
 220 underlying asymmetry becomes critical in real measurements.

| Gas             | $\int (\text{Theo} - \text{Meas})_{\text{fill}}$ | $\int (\text{Theo} - \text{Meas})_{\text{empty}}$ | difference | $\lambda_{\text{fill}}$ | $\lambda_{\text{empty}}$ |
|-----------------|--------------------------------------------------|---------------------------------------------------|------------|-------------------------|--------------------------|
| NH <sub>3</sub> | 16.23                                            | -16.33                                            | -0.20      | 5.40                    | 0.36                     |
| NO <sub>2</sub> | 13.40                                            | -13.64                                            | -0.23      | 3.04                    | 0.40                     |
| HONO            | 13.57                                            | -13.65                                            | -0.05      | 3.14                    | 0.40                     |

221

## S8. References

- Burkholder, J. B., Sander, S. P., Abbatt, J. P. D., Barker, J. R., Cappa, C., Crouse, J. D., Dibble, T. S., Huie, R. E., Kolb, C. E., Kurylo, M. J., Orkin, V. L., Percival, C. J., Wilmout, D. M., and Wine, P. H.: Chemical Kinetics and Photochemical Data for Use in Atmospheric Studies – Evaluation Number 19, NASA JPL Publication 19-5, Tables 4C-1-2, 4C-1-3, and 4C-7-2, <https://jpldataeval.jpl.nasa.gov/>, (last accessed: 2026-03-25), 2020.
- Crilley, L. R., Lao, M., Salehpoor, L., and VandenBoer, T. C.: Emerging investigator series: an instrument to measure and speciate the total reactive nitrogen budget indoors: description and field measurements, *Environ. Sci.: Processes Impacts*, 25, 389–404, <https://doi.org/10.1039/d2em00446a>, 2023.
- Ebnesajjad, S.: Introduction to fluoropolymers, in: *Applied Plastics Engineering Handbook: Processing, Materials, and Applications*, 2nd edn., edited by: Kutz, M., Elsevier, 55–71, <https://doi.org/10.1016/B978-0-323-39040-8.00003-1>, 2017.
- Ellis, R. A., Murphy, J. G., Pattey, E., van Haarlem, R., O'Brien, J. M., and Herndon, S. C.: Characterizing a Quantum Cascade Tunable Infrared Laser Differential Absorption Spectrometer (QC-TILDAS) for measurements of atmospheric ammonia, *Atmos. Meas. Tech.*, 3, 397–406, <https://doi.org/10.5194/amt-3-397-2010>, 2010
- George, C., Ammann, M., D'Anna, B., Donaldson, D. J., and Nizkorodov, S. A.: Heterogeneous photochemistry in the atmosphere, *Chem. Rev.*, 115, 4218–4258, <https://doi.org/10.1021/cr500648z>, 2015.
- Lao, M., Crilley, L. R., Salehpoor, L., Furlani, T. C., Bourgeois, I., Neuman, J. A., Rollins, A. W., Veres, P. R., Washenfelder, R. A., Womack, C. C., Young, C. J., and VandenBoer, T. C.: A portable, robust, stable, and tunable calibration source for gas-phase nitrous acid (HONO), *Atmos. Meas. Tech.*, 13, 5873–5890, <https://doi.org/10.5194/amt-13-5873-2020>, 2020.
- Ma, L., Pascalidou, E. M., Wiame, F., Zanna, S., Maurice, V., and Marcus, P.: Passivation mechanisms and pre-oxidation effects on model surfaces of FeCrNi austenitic stainless steel, *Corros. Sci.*, 167, 108483, <https://doi.org/10.1016/J.CORSCI.2020.108483>, 2020.
- Pape, L., Ammann, C., Nyfeler-Brunner, A., Spirig, C., Hens, K., and Meixner, F. X.: An automated dynamic chamber system for surface exchange measurement of non-reactive and reactive trace gases of grassland ecosystems, *Biogeosciences*, 6, 405–429, <https://doi.org/10.5194/bg-6-405-2009>, 2009.
- Plake, D., Stella, P., Moravek, A., Mayer, J. C., Ammann, C., Held, A., and Trebs, I.: Comparison of ozone deposition measured with the dynamic chamber and the eddy covariance method, *Agr. Forest Meteorol.*, 206, 97–112, <https://doi.org/10.1016/j.agrformet.2015.02.014>, 2015.

- Salehpoor, L. and VandenBoer, T. C.: Suppressor and calibration standard limitations in cation chromatography of ammonium and 10 alkylamines in atmospheric samples, *Anal. Methods*, 15, 3822–3842, <https://doi.org/10.1039/d3ay01158e>, 2023.
- Sapag, K., Vallone, A., Blanco, A. A. G., and Solar, C.: Adsorption of methane in porous materials as the basis for the storage of natural gas, in: *Natural Gas*, edited by: Kumar, S., IntechOpen, <https://doi.org/10.5772/9846>, 2010.
